# Supplementary material for: Deep-Blue Triplet–Triplet Annihilation Organic Light-Emitting Diode (CIEy ≈ 0.05) Using Tetraphenylimidazole and Benzonitrile Functionalized Anthracene/Chrysene Emitters
Source: MDPI journal article supplement (doi:10.3390/molecules27248923), 2022-12-15
Supplement: s1 [file s1]

## Supporting Information

### Materials synthesis and characterization

**2-(4-Bromophenyl)-1,4,5-triphenyl-2,5-dihydro-1H-imidazole (1):** A mixture of benzil (1.5 g, 7.10 mmol), 4-bromobenzaldehyde (1.32 g, 7.10 mmol) was dissolved in acetic acid (30 mL), and stirred at room temperature. Aniline (0.98 mL, 10.70 mmol) was added dropwise and ammonium acetate (2.75 g, 35.70 mmol) was then added to the reaction mixture, followed by heat to 110°C for 12 hours. After completion, the reaction was allowed to room temperature and pour into an ice bath. The crude solid was filtered and washed with water. The filtered solid was dissolved in dichloromethane, washed with water (4 x 30 mL), dried (Na<sub>2</sub>SO<sub>4</sub>), and concentrated *in vacuo*. The product was purified by recrystallization in dichloromethane/methanol to give light brown solids (2.30 g, 74%). <sup>1</sup>H-NMR (600 MHz, CDCl<sub>3</sub>) δ 7.60-7.55 (2H, m, Ar-H), 7.39-7.35 (2H, m, Ar-H), 7.32 - 7.17 (11H, m, Ar-H), 7.12 (2H, d, *J* = 6.8 Hz, Ar-H), 7.04 (2H, d, *J* = 6.8 Hz, Ar-H); <sup>13</sup>C-NMR (151 MHz, CDCl<sub>3</sub>) δ 145.8, 138.5, 136.9, 134.3, 131.3, 131.2, 131.1, 130.5, 130.3, 129.5, 129.2, 128.5, 128.4, 128.2, 128.1, 127.4, 126.7, 122.6. HRMS APCI (*m/z*): calcd for C<sub>48</sub>H<sub>31</sub>N<sub>3</sub>: 452.0711, found: 453.0672 [MH]<sup>+</sup>.

**1,4,5-Triphenyl-2-(4-(4,4,5,5-tetramethyl-1,3,2-dioxaborolan-2-yl)phenyl)-2,5-dihydro-1H-imidazole (2):** A mixture of **1** (2.2 mmol), bispinacolatodiboron (1.7 g, 7 mmol), and potassium acetate (2.7 g, 27.0 mmol) was suspended in dried toluene (40 mL) under a nitrogen atmosphere. Bis(triphenylphosphine)palladium(II) dichloride Pd(PPh<sub>3</sub>)<sub>2</sub>Cl<sub>2</sub> (77.2 mg, 0.11 mmol) was added and degassed for 10 minutes. The reaction mixture was stirred for 12 hours under reflux, cooled to room temperature and water was added. The resulting mixture was extracted with dichloromethane (4 x 70 mL), washed the organic layer with brine, dried over Na<sub>2</sub>SO<sub>4</sub>, and concentrated *in vacuo*. The product was purified by column chromatography on silica gel eluting with hexane:dichloromethane (6:4) to give white solids (1.13 g, 90%). <sup>1</sup>H-NMR (600 MHz, CDCl<sub>3</sub>) δ 7.67 (2H, d, *J* = 8.0 Hz, Ar-H), 7.60 (2H, d, *J* = 7.4 Hz, Ar-H), 7.43 (2H, d, *J* = 8.0 Hz, Ar-H), 7.29-7.17 (7H m, Ar-H), 7.14 (2H, d, *J* = 8.0 Hz, Ar-H), 7.04 (2H, d, *J* = 7.0 Hz, Ar-H), 1.32 (12H, s, (CH<sub>3</sub>)<sub>4</sub>); <sup>13</sup>C-NMR (151 MHz, CDCl<sub>3</sub>) δ 146.7, 138.5, 137.2, 134.4, 134.4, 133.0, 131.2, 131.1, 130.6, 129.1, 128.4, 128.3, 128.3, 128.1, 128.0, 127.4, 126.6, 83.9, 24.9. HRMS APCI (*m/z*): calcd for C<sub>48</sub>H<sub>31</sub>N<sub>3</sub>: 498.2479, found: 498.2422 [M]<sup>+</sup>.

**4-(10-Bromoanthracen-9-yl)benzonitrile (3):** A mixture of 9,10-dibromoanthracene (200 mg, 1.36 mmol) and 4-cyanophenylboronic acid (1.4 g, 4.08 mmol) was dissolved in dried THF (30 mL) under a nitrogen atmosphere. 10% K<sub>2</sub>CO<sub>3</sub> (aq) (10 mL) was added and stirred at ambient temperature. Tetrakis(triphenylphosphine)palladium(0) Pd(PPh<sub>3</sub>)<sub>4</sub> (78.6 mg, 5 mol%) was then added and degassed the reaction mixture for 10 minutes. The reaction mixture was heated to reflux. After 18 h the reaction was stopped, cooled to room temperature, and water was added to the reaction mixture. The resulting solution was extracted by dichloromethane (3 x 50 mL) and the organic layer was washed with brine (3 x 20 mL), dried (Na<sub>2</sub>SO<sub>4</sub>), and concentrated *in vacuo*. Purification by column chromatography on silica gel eluting with gradient hexane:dichloromethane from 100% to 50% to give yellow solids (318 mg, 65%). <sup>1</sup>H-NMR (600

MHz, CDCl<sub>3</sub>)  $\delta$  8.59 (2H, dt,  $J$  = 8.9, 0.9 Hz, Ar-*H*), 7.70–7.64 (4H, m, Ar-*H*), 7.62 (2H, dt,  $J$  = 8.8, 0.9 Hz, Ar-*H*), 7.58 (2H, ddd,  $J$  = 8.9, 6.5, 1.2 Hz, Ar-*H*), 7.37 (2H, ddd,  $J$  = 8.7, 6.5, 1.1 Hz, Ar-*H*), 7.34 (3H, dd,  $J$  = 5.0, 1.9 Hz, Ar-*H*), 7.31–7.24 (8H, m, Ar-*H*), 7.23–7.17 (5H, m, Ar-*H*); <sup>13</sup>C NMR (151 MHz, CDCl<sub>3</sub>)  $\delta$  146.6, 138.5, 138.3, 137.2, 137.2, 134.4, 131.2, 131.0, 130.9, 130.7, 130.2, 130.1, 129.2, 128.6, 128.5, 128.4, 128.2, 128.1, 127.9, 127.4, 127.3, 126.9, 126.7, 125.6, 122.8. HRMS APCI ( $m/z$ ): calcd for C<sub>48</sub>H<sub>31</sub>N<sub>3</sub>: 357.0153, found: 358.0166 [MH]<sup>+</sup>.

**4-(12-Bromochrysen-6-yl)benzonitrile (4):** A mixture of 6,12-Dibromochrysene (700 mg, 1.80 mmol) and 4-cyanophenylboronic acid (88 mg, 0.6 mmol) was dissolved in dried THF (60 mL) under a nitrogen atmosphere. 10% K<sub>2</sub>CO<sub>3</sub> (aq) (10 mL) was added and stirred at ambient temperature. Tetrakis(triphenylphosphine)palladium(0) Pd(PPh<sub>3</sub>)<sub>4</sub> (35 mg, 5 mol%) was then added and degassed the reaction mixture for 10 minutes. The reaction mixture was heated to reflux. After 18h the reaction was stopped, cooled to room temperature, and water was added to the reaction mixture. The resulting solution was extracted by dichloromethane (3 x 50 mL) and the organic layer was washed with brine (3 x 20 mL), dried (Na<sub>2</sub>SO<sub>4</sub>), and concentrated *in vacuo*. Purification by column chromatography on silica gel eluting with gradient hexane:dichloromethane from 100% to 50% to give yellow solids (147.6 mg, 60%). <sup>1</sup>H-NMR (600 MHz, CDCl<sub>3</sub>)  $\delta$  9.09 (1H, s, Ar-*H*), 8.80 (1H, d,  $J$  = 8.4 Hz, Ar-*H*), 8.78–8.73 (1H, m, Ar-*H*), 8.56 (1H, s, Ar-*H*), 8.50–8.45 (1H, m, Ar-*H*), 7.92–7.84 (m, 3H), 7.81–7.72 (m, 5H), 7.62 (1H, ddd,  $J$  = 8.1, 6.8, 1.2 Hz, Ar-*H*); <sup>13</sup>C-NMR (151 MHz, CDCl<sub>3</sub>)  $\delta$  145.9, 137.8, 132.3, 131.4, 130.9, 130.8, 130.4, 130.0, 128.7, 128.3, 127.8, 127.8, 127.3, 127.2, 127.1, 126.2, 125.3, 123.6, 123.5, 123.3, 122.3, 118.8, 111.6. HRMS APCI ( $m/z$ ): calcd for C<sub>48</sub>H<sub>31</sub>N<sub>3</sub>: 409.0289, found: 409.9745 [MH]<sup>+</sup>.

Figure S1. Copies of  $^1\text{H}/^{13}\text{C}$ - NMR spectra and HRMS mass spectra

2-(4-Bromophenyl)-1,4,5-triphenyl-2,5-dihydro-1H-imidazole (1)

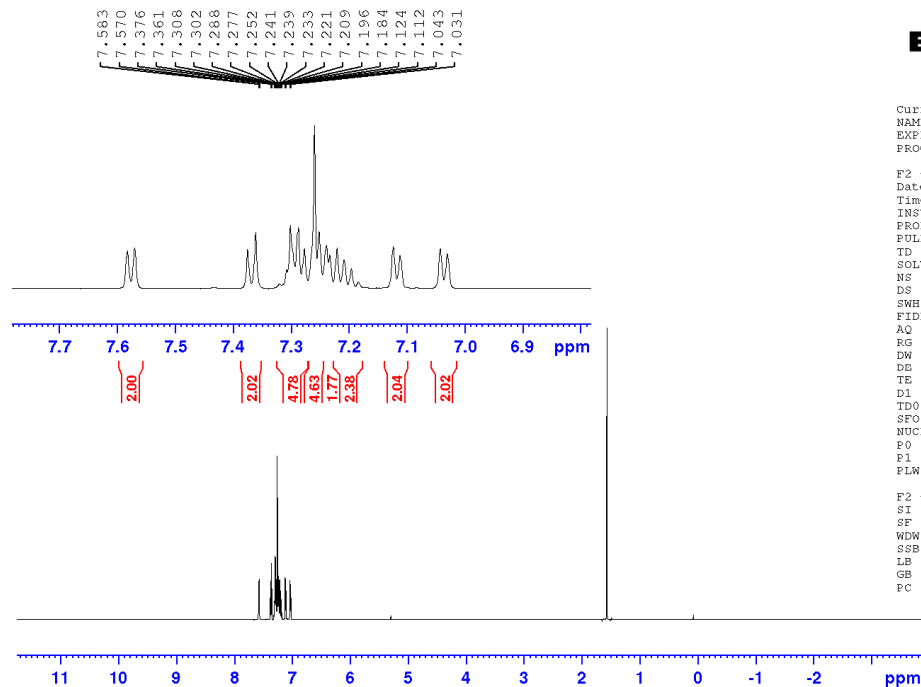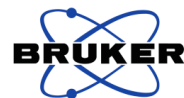

Current Data Parameters  
NAME WW53-1C1  
EXPNO 1  
PROCNO 1

F2 - Acquisition Parameters  
Date\_ 20190620  
Time 15.38 h  
INSTRUM spect  
PROBHD Z115435\_0005 (   
PULPROG zg30  
TD 65536  
SOLVENT CDCl3  
NS 8  
DS 2  
SWH 12019.230 Hz  
FIDRES 0.366798 Hz  
AQ 2.7262976 sec  
RG 191.96  
DW 41.600 usec  
DE 40.00 usec  
TE 298.2 K  
D1 1.00000000 sec  
TD0 1  
SFO1 600.1337058 MHz  
NUC1 1H  
P0 3.13 usec  
F1 9.40 usec  
PLW1 19.99900055 W

F2 - Processing parameters  
SI 65536  
SF 600.1300154 MHz  
WDW EM  
SSB 0  
LB 0.30 Hz  
GB 0  
PC 1.00

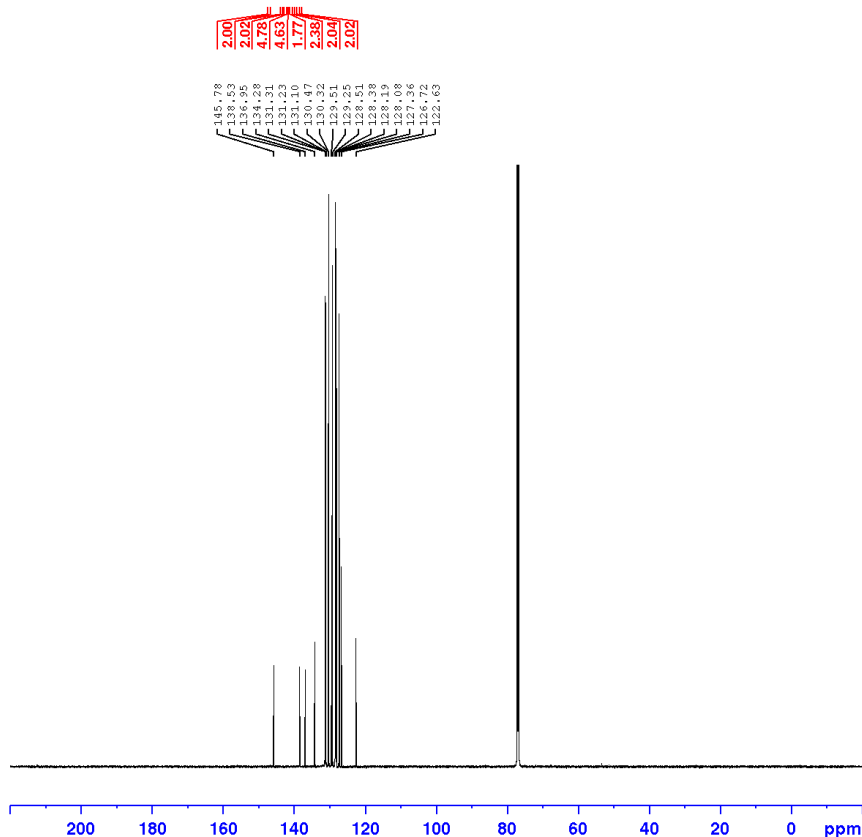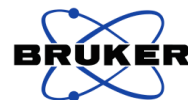

Current Data Parameters  
NAME WW53-1C1  
EXPNO 10  
PROCNO 1

F2 - Acquisition Parameters  
Date\_ 20190711  
Time 1.32 h  
INSTRUM spect  
PROBHD Z115435\_0005 (   
PULPROG zgpg30  
TD 65536  
SOLVENT CDCl3  
NS 1024  
DS 2  
SWH 36231.883 Hz  
FIDRES 1.105709 Hz  
AQ 0.9043968 sec  
RG 191.96  
DW 13.800 usec  
DE 18.00 usec  
TE 303.2 K  
D1 2.00000000 sec  
D11 0.03000000 sec  
TD0 1  
SFO1 150.9178988 MHz  
NUC1 13C  
P0 3.73 usec  
F1 11.20 usec  
PLW1 26.00000000 W  
SFO2 600.1324005 MHz  
NUC2 1H  
CPDPRG2 waltz16  
PCPD2 70.00 usec  
PLW2 19.99799919 W  
PLW12 0.49383000 W  
PLW13 0.24839000 W

F2 - Processing parameters  
SI 32768  
SF 150.9026085 MHz  
WDW EM  
SSB 0  
LB 1.00 Hz  
GB 0  
PC 1.40

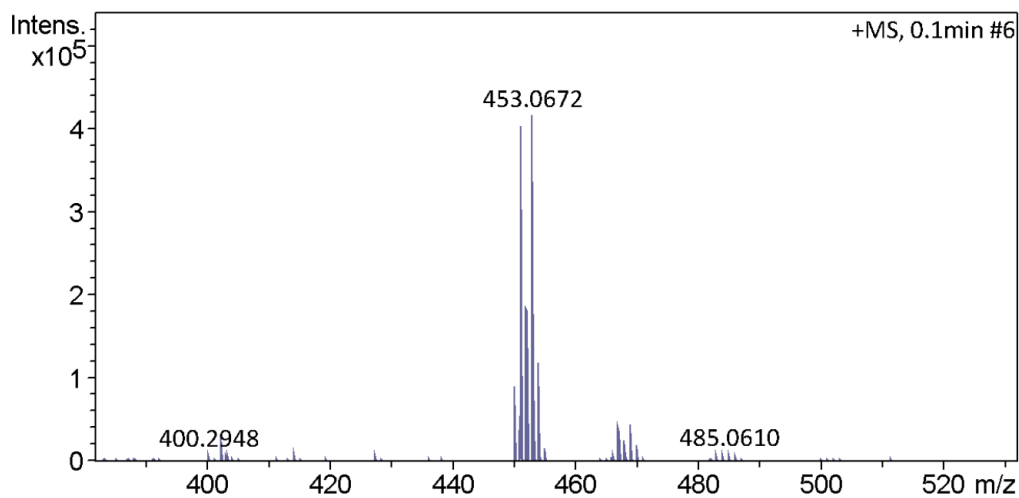

**1,4,5-Triphenyl-2-(4-(4,4,5,5-tetramethyl-1,3,2-dioxaborolan-2-yl)phenyl)-2,5-dihydro-1H-imidazole (2)**

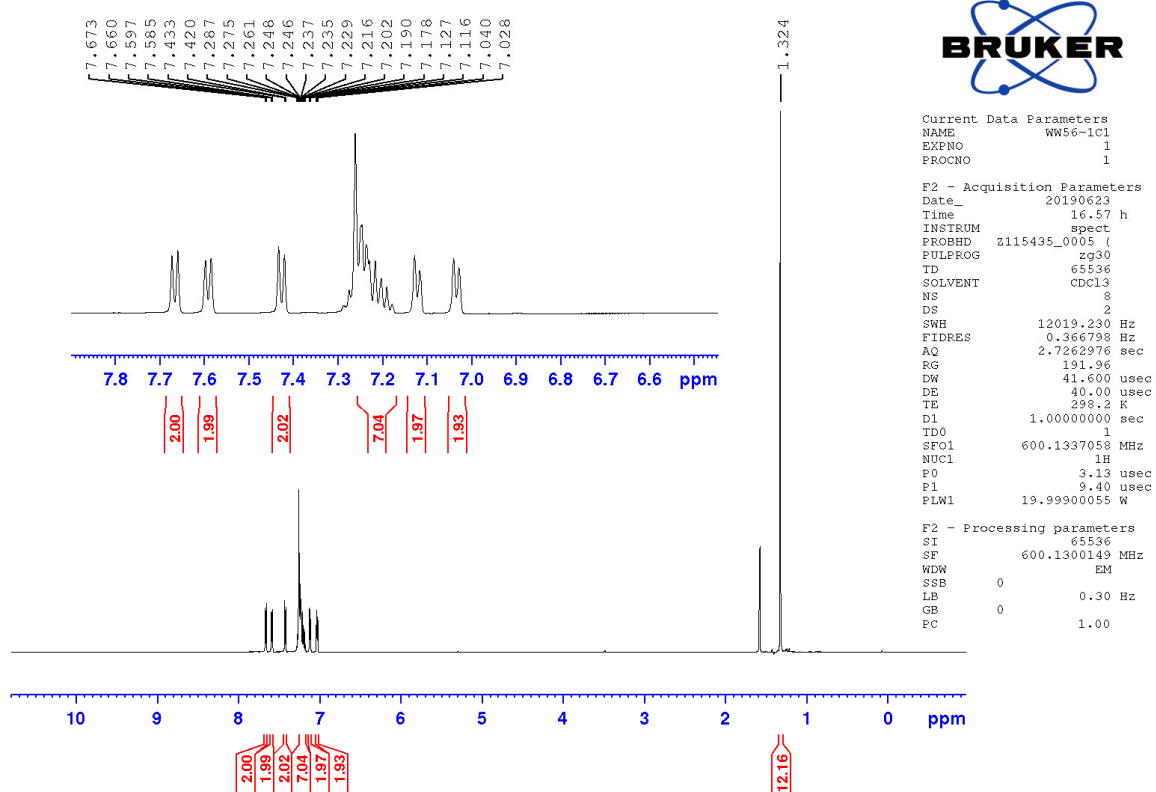

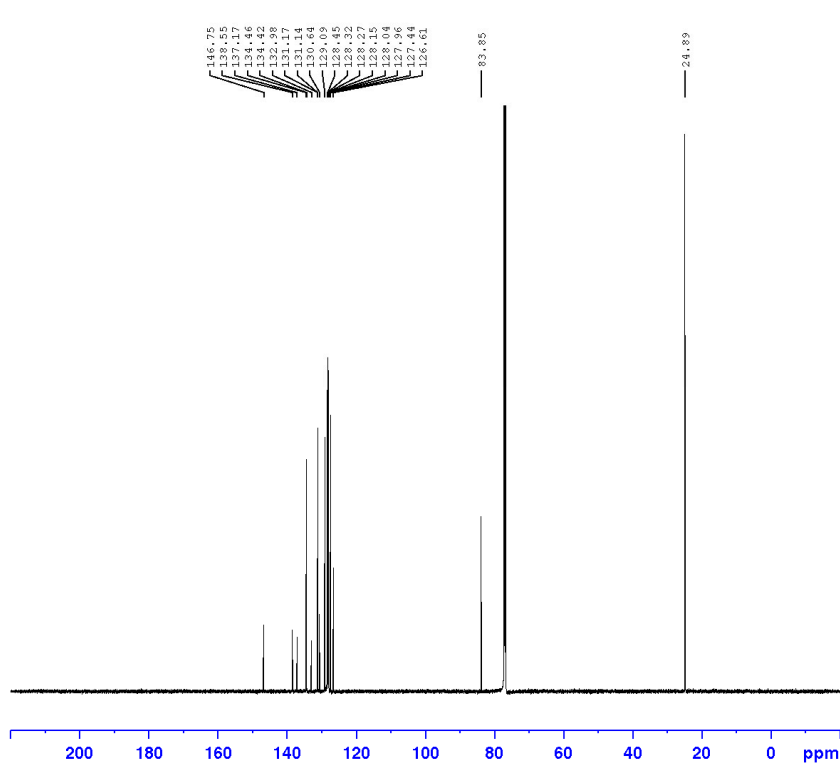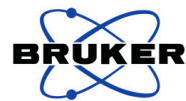

Current Data Parameters  
NAME WW56-1C1  
EXPNO 10  
PROCNO 1

F2 - Acquisition Parameters  
Date\_ 20190711  
Time 2.26 h  
INSTRUM spect  
PROBHD Z115435\_0005 ( )  
PULPROG zgpg30  
TD 65536  
SOLVENT CDCl3  
NS 1024  
DS 2  
SWH 36231.883 Hz  
FIDRES 1.105709 Hz  
AQ 0.9043968 sec  
RG 191.96  
DW 13.800 usec  
DE 18.00 usec  
TE 303.2 K  
D1 2.00000000 sec  
D11 0.03000000 sec  
TD0 1  
SFO1 150.9178988 MHz  
NUC1 13C  
P0 3.73 usec  
P1 11.20 usec  
PLW1 26.00000000 W  
SFO2 600.1324005 MHz  
NUC2 1H  
CPDPRG2 waltz16  
PCPD2 70.00 usec  
PLW2 19.99799919 W  
PLW12 0.49383000 W  
PLW13 0.24839000 W

F2 - Processing parameters  
SI 32768  
SF 150.9028085 MHz  
WDW EM  
SSB 0  
LB 1.00 Hz  
GB 0  
PC 1.40

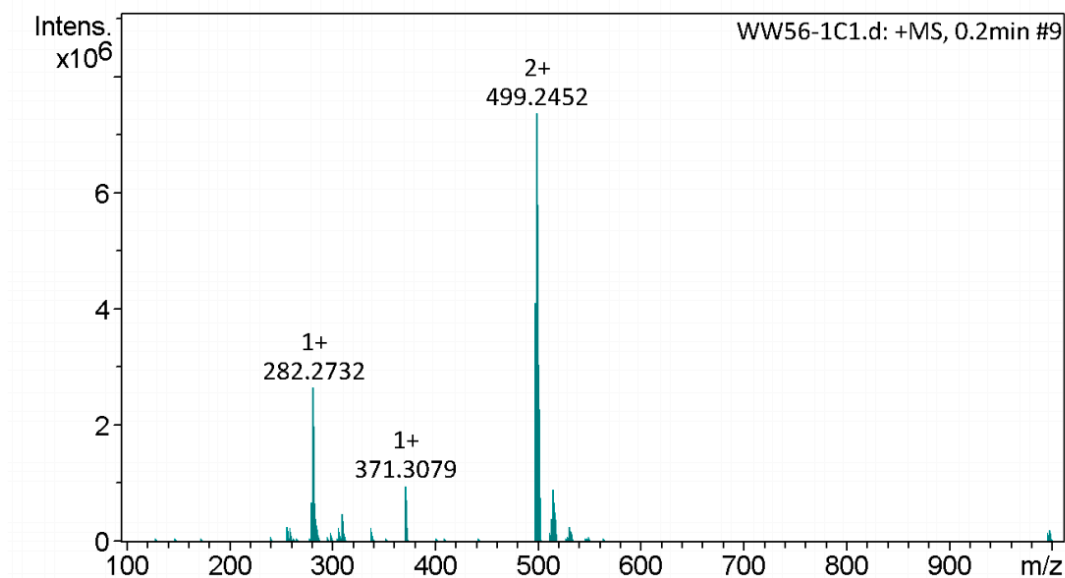

# 4-(10-Bromoanthracen-9-yl)benzonitrile (3)

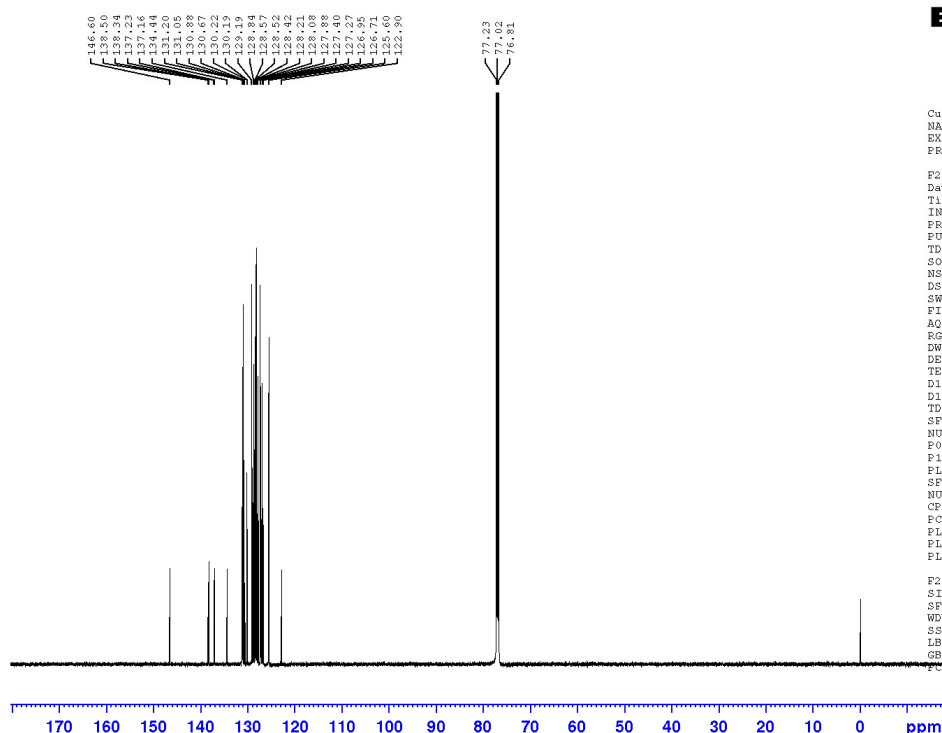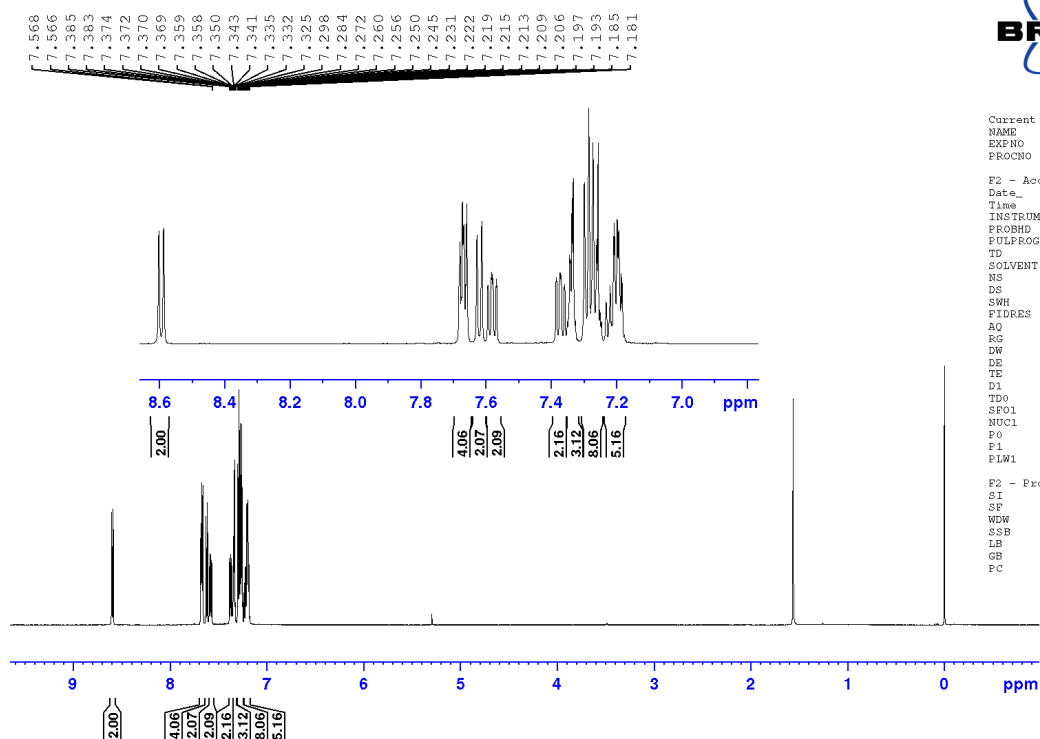

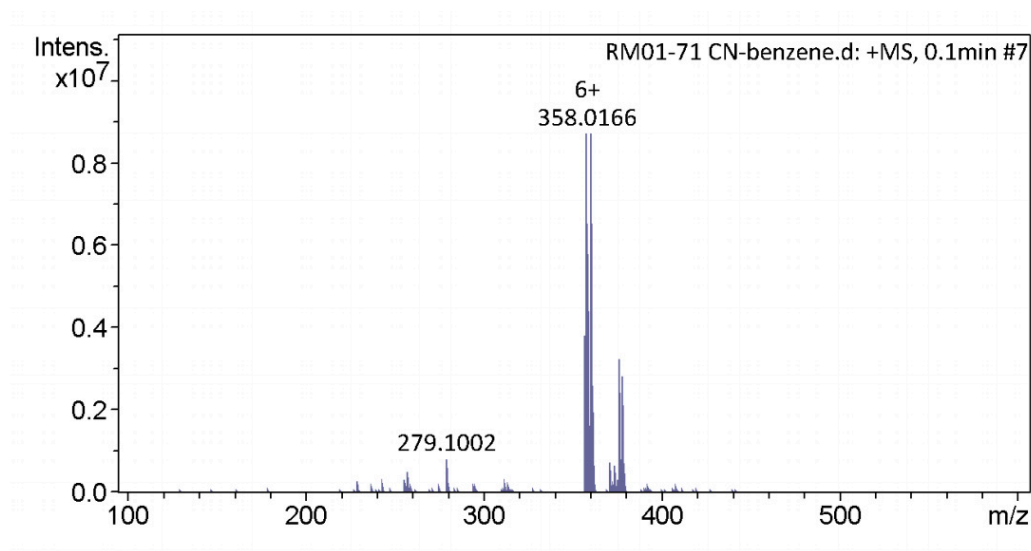

#### 4-(12-Bromochrysen-6-yl)benzonitrile (4)

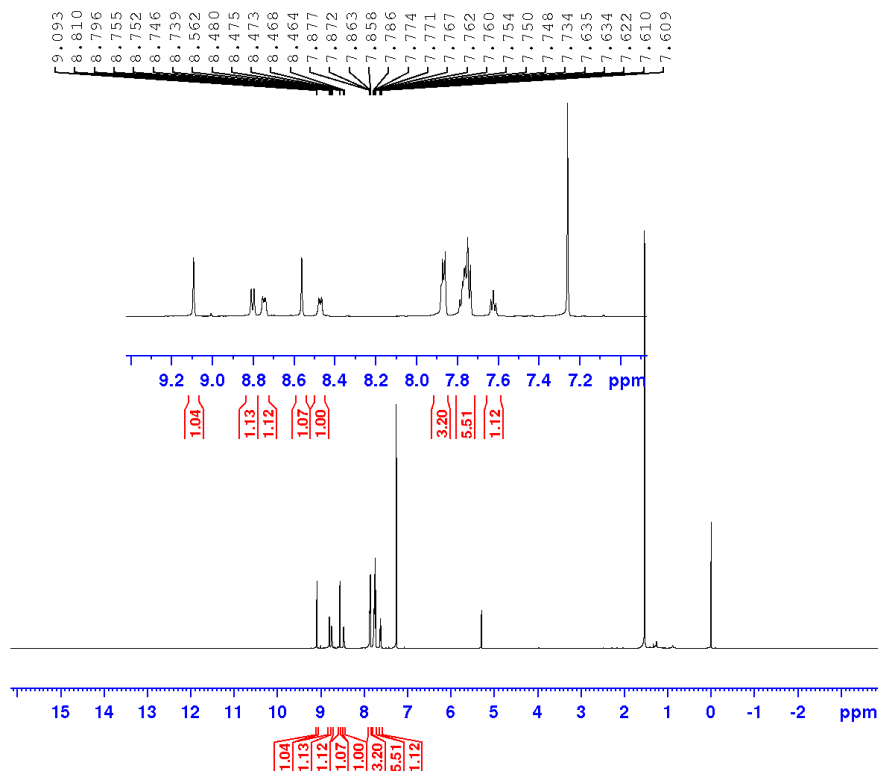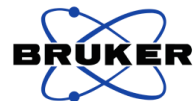

Current Data Parameters  
 NAME WW78-2F3  
 EXPNO 1  
 PROCNO 1

F2 - Acquisition Parameters  
 Date\_ 20190930  
 Time 11.36 h  
 INSTRUM spect  
 PROBHD Z115435\_0005 (   
 PULPROG zg30  
 TD 65536  
 SOLVENT CDCl3  
 NS 32  
 DS 2  
 SWH 12019.230 Hz  
 FIDRES 0.366798 Hz  
 AQ 2.7262976 sec  
 RG 191.96  
 DW 41.600 usec  
 DE 40.00 usec  
 TE 303.1 K  
 D1 1.00000000 sec  
 TD0 1  
 SFO1 600.1337058 MHz  
 NUC1 1H  
 P0 3.67 usec  
 P1 11.00 usec  
 PLW1 19.99799919 W

F2 - Processing parameters  
 SI 65536  
 SF 600.1300163 MHz  
 WDW EM  
 SSB 0  
 LB 0.30 Hz  
 GB 0  
 PC 1.00







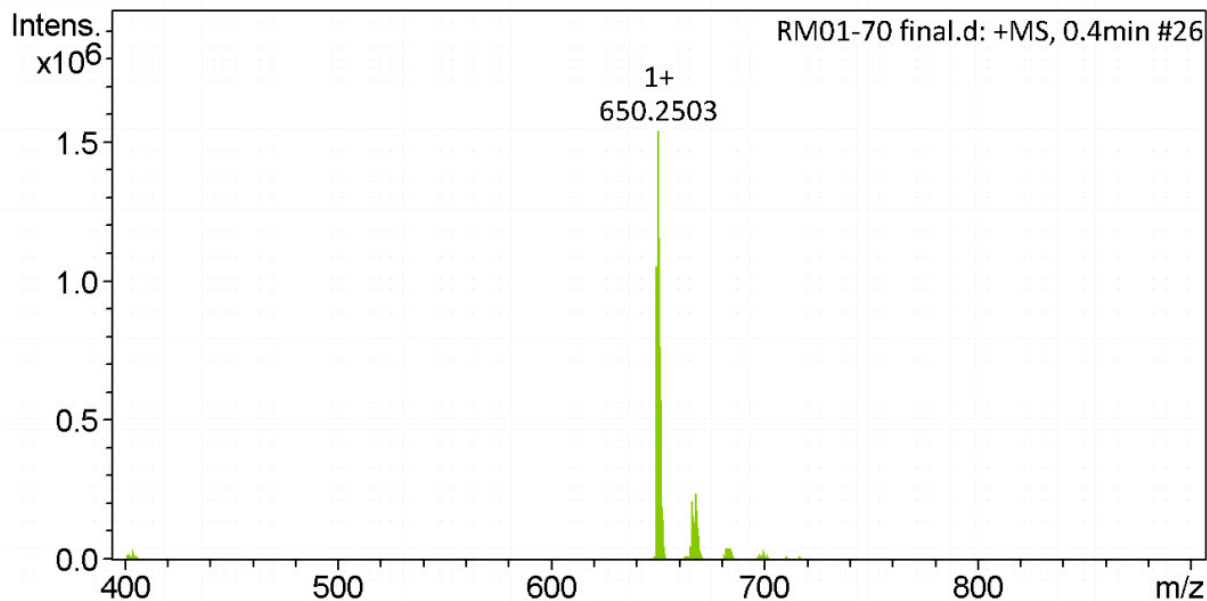

# Compound TPICChCN

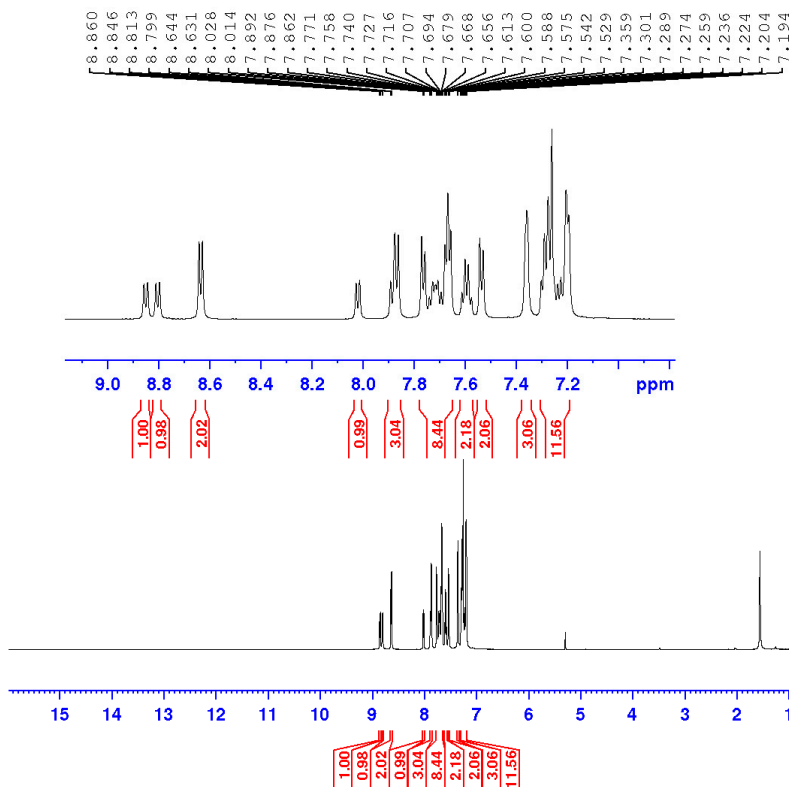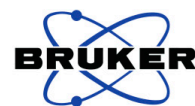

Current Data Parameters  
NAME WW84-1F2C2  
EXPNO 1  
PROCNO 1

F2 - Acquisition Parameters  
Date\_ 20191101  
Time 17.18 h  
INSTRUM spect  
PROBHD Z114607\_0208 (   
PULPROG zg30  
TD 64902  
SOLVENT CDCl3  
NS 8  
DS 2  
SWH 12019.230 Hz  
FIDRES 0.370381 Hz  
AQ 2.6999233 sec  
RG 107.65  
DW 41.600 usec  
DE 6.50 usec  
TE 303.1 K  
D1 2.00000000 sec  
TD0 1  
SFO1 600.1336008 MHz  
NUC1 1H  
P0 3.23 usec  
P1 9.70 usec  
PLW1 23.00000000 W

F2 - Processing parameters  
SI 65536  
SF 600.1300163 MHz  
WDW EM  
SSB 0  
LB 1.00 Hz  
GB 0  
PC 1.00

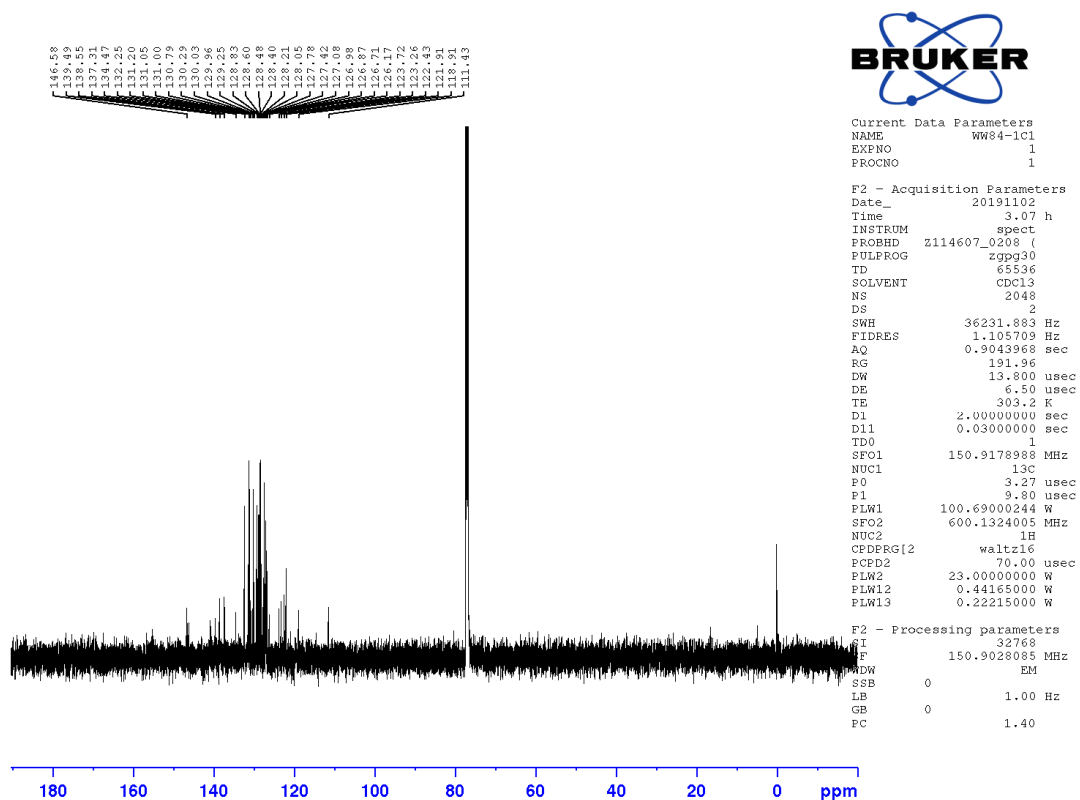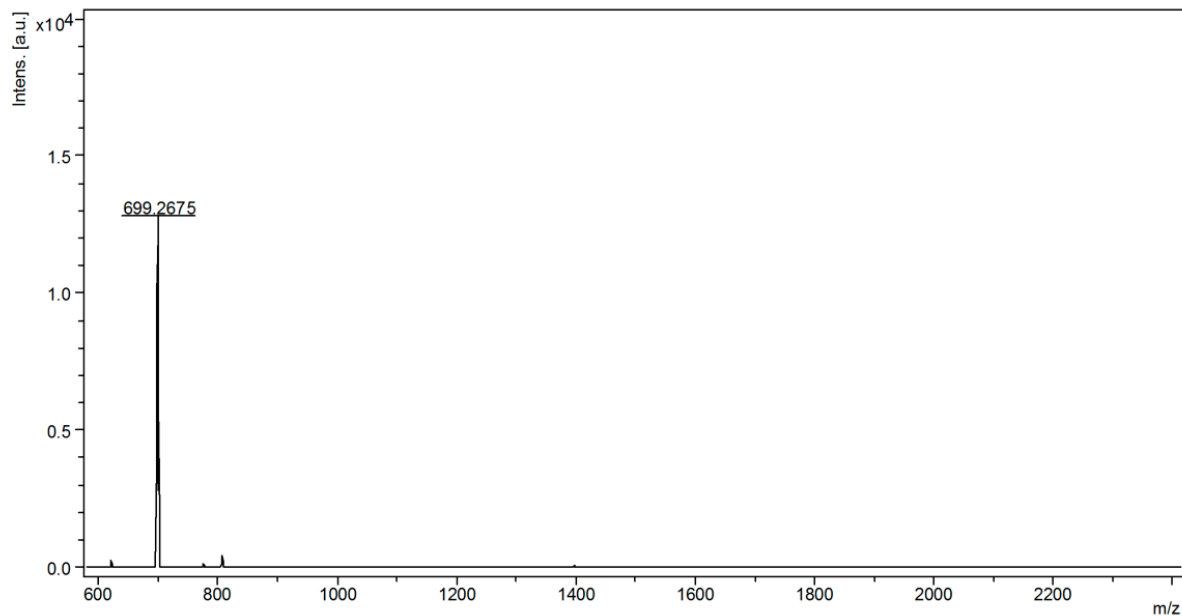

| m/z      | S/N | Quality | Fac. | Res. | Intens. | Area |
|----------|-----|---------|------|------|---------|------|
| 699.2675 |     |         |      |      | 2544    |      |

**Table S1** Crystallographic data of **TPIANCN** and **TPICHCN**.

|                                             |                                                                                   |                                                                                     |
|---------------------------------------------|-----------------------------------------------------------------------------------|-------------------------------------------------------------------------------------|
| <b>Chemical structure</b>                   | 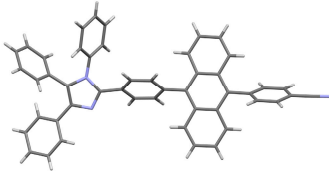 |  |
| <b>CCDC Deposit Number</b>                  | <b>2048655</b>                                                                    | <b>2011495</b>                                                                      |
| Empirical formula                           | C <sub>48</sub> H <sub>31</sub> N <sub>3</sub>                                    | C <sub>53</sub> H <sub>35</sub> Cl <sub>2</sub> N <sub>3</sub>                      |
| Formula weight                              | 649.76                                                                            | 784.74                                                                              |
| Temperature/K                               | 100.0                                                                             | 110.0                                                                               |
| Crystal system                              | monoclinic                                                                        | triclinic                                                                           |
| Space group                                 | P2 <sub>1</sub> /c                                                                | P-1                                                                                 |
| a/Å                                         | 6.0526(4)                                                                         | 10.0312(6)                                                                          |
| b/Å                                         | 14.6484(9)                                                                        | 10.7769(7)                                                                          |
| c/Å                                         | 38.294(3)                                                                         | 18.8593(11)                                                                         |
| α/°                                         | 90                                                                                | 90.123(2)                                                                           |
| β/°                                         | 93.888(3)                                                                         | 101.607(2)                                                                          |
| γ/°                                         | 90                                                                                | 107.107(2)                                                                          |
| Volume/Å <sup>3</sup>                       | 3387.4(4)                                                                         | 1904.6(2)                                                                           |
| Z                                           | 4                                                                                 | 2                                                                                   |
| ρ <sub>calc</sub> /cm <sup>3</sup>          | 1.274                                                                             | 1.368                                                                               |
| μ/mm <sup>-1</sup>                          | 0.573                                                                             | 0.215                                                                               |
| F(000)                                      | 1360.0                                                                            | 816.0                                                                               |
| Crystal size/mm <sup>3</sup>                | 0.25 × 0.12 × 0.03                                                                | 0.554 × 0.284 × 0.058                                                               |
| Radiation                                   | CuKα (λ = 1.54178)                                                                | MoKα (λ = 0.71073)                                                                  |
| 2θ range for data collection/°              | 4.626 to 99.484                                                                   | 3.962 to 52.744                                                                     |
| Index ranges                                | -5 ≤ h ≤ 5,<br>-13 ≤ k ≤ 14,<br>-37 ≤ l ≤ 37                                      | -12 ≤ h ≤ 12,<br>-13 ≤ k ≤ 13,<br>-23 ≤ l ≤ 23                                      |
| Reflections collected                       | 35796                                                                             | 74150                                                                               |
| Independent reflections                     | 3420 [R <sub>int</sub> = 0.1802,<br>R <sub>sigma</sub> = 0.1039]                  | 7800 [R <sub>int</sub> = 0.0510,<br>R <sub>sigma</sub> = 0.0259]                    |
| Data/restraints/parameters                  | 3420/0/460                                                                        | 7800/0/524                                                                          |
| Goodness-of-fit on F <sup>2</sup>           | 1.046                                                                             | 1.052                                                                               |
| Final R indexes [I ≥ 2σ (I)]                | R <sub>1</sub> = 0.0634, wR <sub>2</sub> = 0.1071                                 | R <sub>1</sub> = 0.0630, wR <sub>2</sub> = 0.1710                                   |
| Final R indexes [all data]                  | R <sub>1</sub> = 0.1255, wR <sub>2</sub> = 0.1253                                 | R <sub>1</sub> = 0.0749, wR <sub>2</sub> = 0.1788                                   |
| Largest diff. peak/hole / e Å <sup>-3</sup> | 0.21/-0.24                                                                        | 0.82/-1.34                                                                          |

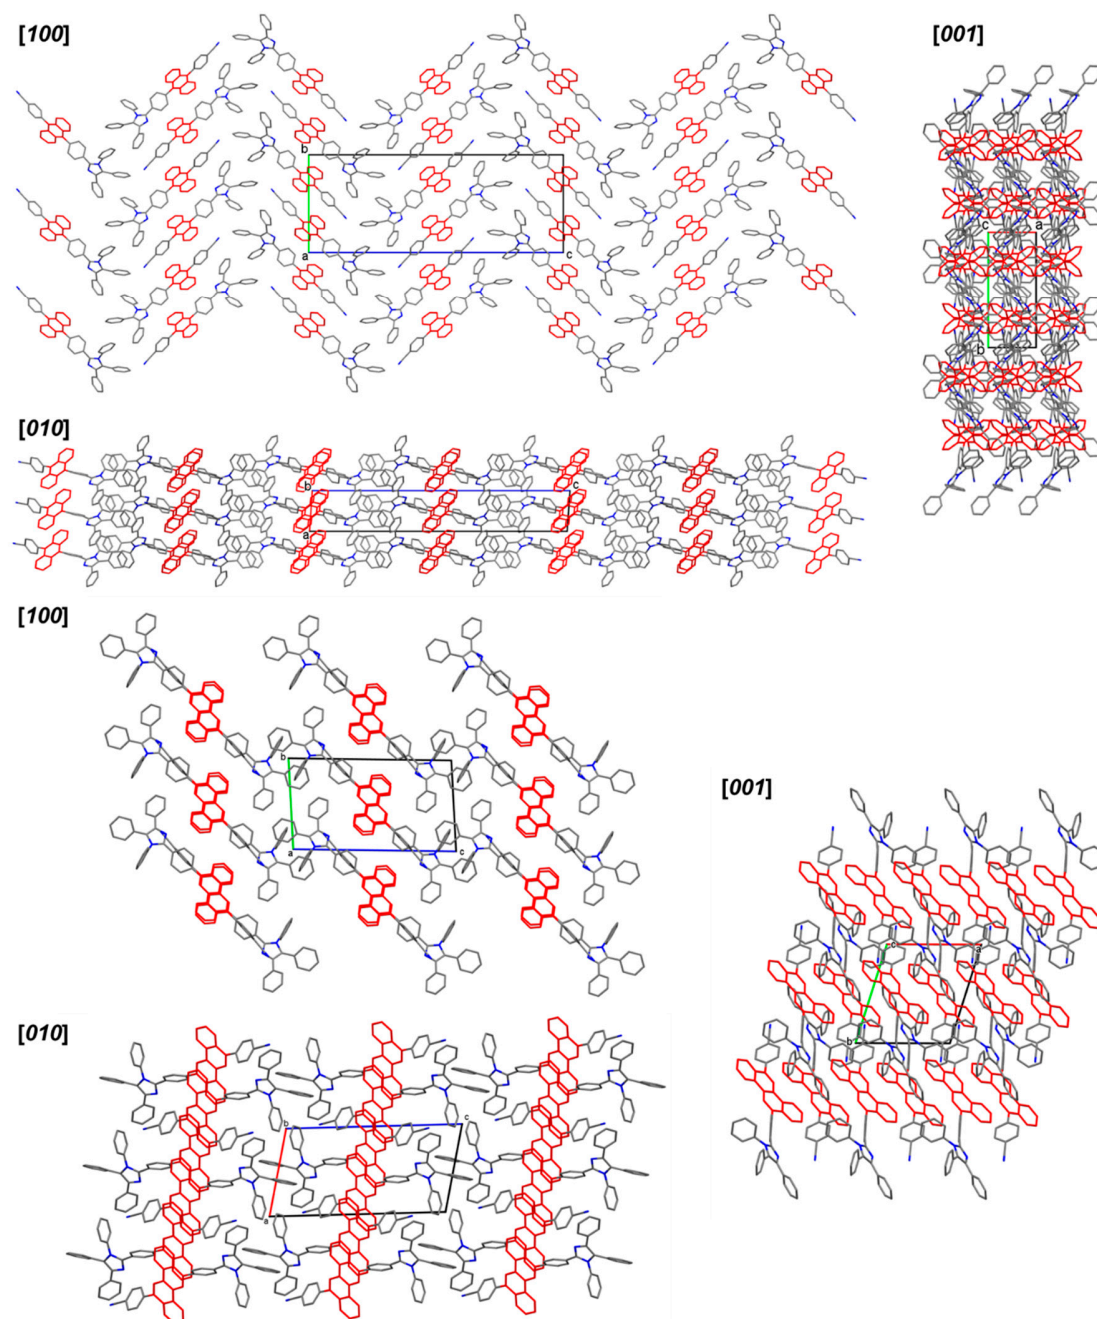

**Figure S2.** Crystal packing of (top) **TPIAnCN** and (bottom) **TPICnCN** along  $[100]$ ,  $[010]$  and  $[001]$  directions with red-highlighted structures of anthracene and chrysene cores, respectively. All hydrogen atoms and solvent residues were omitted for clarity.

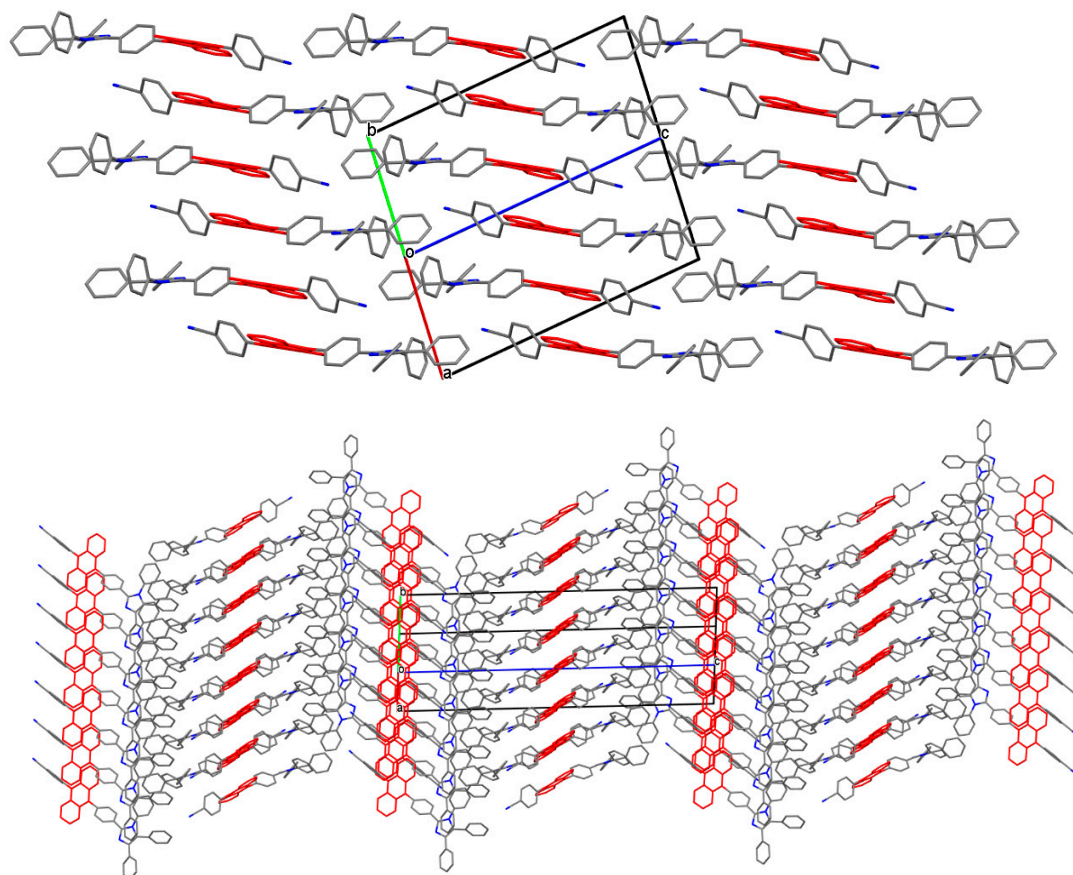

**Figure S3.** Packing structure of (top) **TPIAnCN** and (bottom) **TPICnCN** along  $[110]$  and  $[210]$  directions, respectively, with red-highlighted structures of anthracene and chrysene moieties. All hydrogen atoms and solvent residues were omitted for clarity.

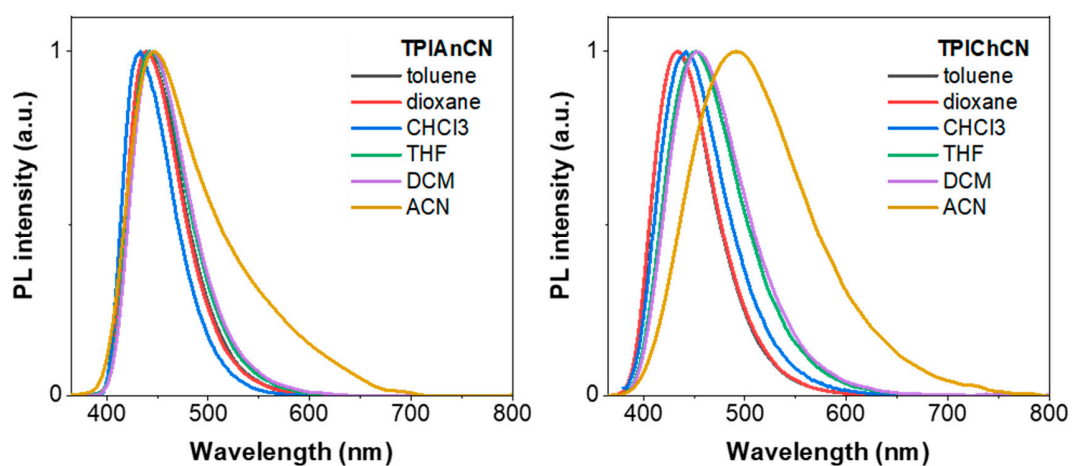

**Figure S4.** PL spectra in different solvents.

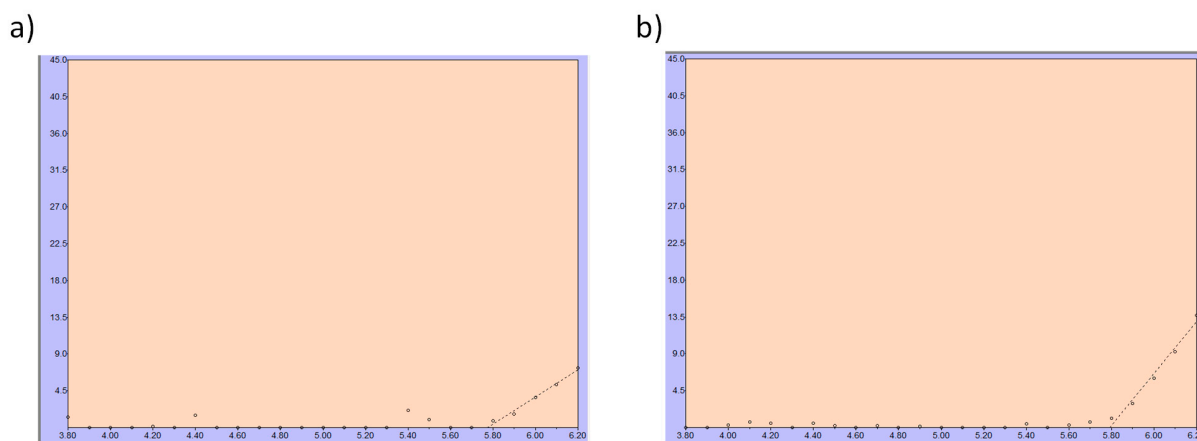

**Figure S5.** AC-2 plots of a) TPIAnCN and b) TPICnCN.

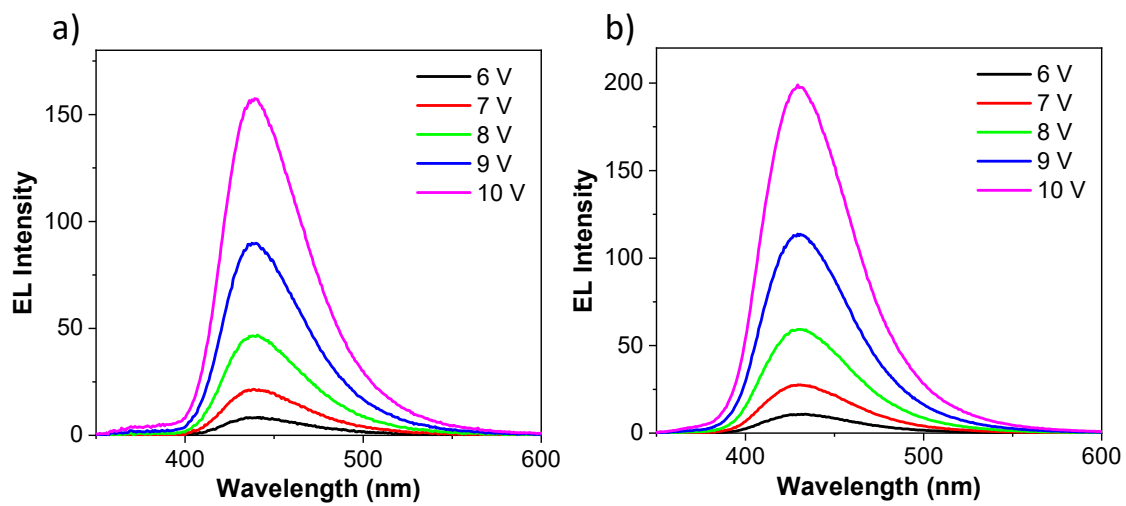

**Figure S6.** EL spectra under different applied voltages.
